# Supplementary material for: Development of a Reliable ic-ELISA with a Robust Antimatrix Interference Capability Based on QuEChERS Technology for the Rapid Detection of Zearalenone in Edible and Medical Coix Seeds and Subsequent Risk Assessments
Source: MDPI journal article supplement (doi:10.3390/foods11192983), 2022-09-24
Supplement: s1 [file s1]

# Development of a Reliable ic-ELISA with a Robust Antimatrix Interference Capability Based on QuEChERS Technology for the Rapid Detection of Zearalenone in Edible and Medical Coix Seeds and Subsequent Risk Assessments

## Supplementary table

**Suppl. Table S1.** ZEN contamination levels in 122 batches of coix seeds.

| Sample No. | Region          | Province/City | ZEN contamination (µg/kg) |             |
|------------|-----------------|---------------|---------------------------|-------------|
|            |                 |               | Ic-ELISA                  | UHPLC-MS/MS |
| 1          | Southwest China | Guizhou       | 133.02                    | 117.29      |
| 2          |                 | Guizhou       | 41.44                     | 62.00       |
| 3          |                 | Guizhou       | 19.94                     | n.d.        |
| 4          |                 | Guizhou       | 150.38                    | 147.21      |
| 5          |                 | Guizhou       | 220.82                    | 321.97      |
| 6          |                 | Guizhou       | 22.93                     | 18.91       |
| 7          |                 | Guizhou       | 29.36                     | n.d.        |
| 8          |                 | Guizhou       | 19.64                     | 25.02       |
| 9          |                 | Guizhou       | 61.68                     | 68.20       |
| 10         |                 | Guizhou       | 52.70                     | 33.13       |
| 11         |                 | Guizhou       | 33.56                     | 38.16       |
| 12         |                 | Guizhou       | 116.53                    | 98.53       |
| 13         |                 | Guizhou       | 59.90                     | 89.67       |
| 14         |                 | Guizhou       | 158.93                    | 120.84      |
| 15         |                 | Guizhou       | 1156.09                   | 1209.27     |
| 16         |                 | Guizhou       | 23.40                     | 57.11       |
| 17         |                 | Guizhou       | 43.14                     | 32.90       |
| 18         |                 | Guizhou       | 20.05                     | 11.57       |
| 19         |                 | Guizhou       | 19.53                     | 18.60       |
| 20         |                 | Guizhou       | 53.51                     | 69.19       |
| 21         |                 | Guizhou       | 38.42                     | 57.74       |
| 22         |                 | Guizhou       | 62.87                     | 59.83       |
| 23         |                 | Guizhou       | 75.94                     | 93.32       |
| 24         |                 | Guizhou       | 158.87                    | 160.72      |
| 25         |                 | Guizhou       | 88.82                     | 98.81       |
| 26         |                 | Guizhou       | 58.36                     | 94.91       |
| 27         |                 | Guizhou       | 279.94                    | 391.64      |
| 28         |                 | Guizhou       | 81.13                     | 84.33       |
| 29         |                 | Guizhou       | <LOQ                      | 10.81       |

|                 |                                    |                |         |         |
|-----------------|------------------------------------|----------------|---------|---------|
| 30              |                                    | Guizhou        | 42.77   | 46.09   |
| 31              |                                    | Guizhou        | 622.18  | 607.70  |
| 32              |                                    | Guizhou        | 225.20  | 245.72  |
| 33              |                                    | Guizhou        | 56.00   | 55.57   |
| 34              |                                    | Guizhou        | 97.32   | 101.30  |
| 35              |                                    | Guizhou        | 74.10   | 84.91   |
| 36              |                                    | Guizhou        | 56.10   | 42.89   |
| 37              |                                    | Guizhou        | 170.88  | 169.72  |
| 38              |                                    | Guizhou        | 725.87  | 936.34  |
| 39              |                                    | Guizhou        | 161.58  | 178.78  |
| 40              |                                    | Guizhou        | 34.28   | 25.02   |
| 41              |                                    | Guizhou        | 279.03  | 446.36  |
| 42              |                                    | Guizhou        | 26.99   | 36.64   |
| 43              |                                    | Guizhou        | <LOQ    | 15.12   |
| 44              |                                    | Guizhou        | 30.94   | 27.31   |
| 45              |                                    | Guizhou        | 29.92   | 36.45   |
| 46              |                                    | Guizhou        | 36.45   | 25.33   |
| 47 <sup>a</sup> |                                    | Guizhou        | 5094.70 | 3862.34 |
| 48              |                                    | Guizhou        | 123.52  | 142.95  |
| 49              |                                    | Yunnan         | 27.50   | 20.89   |
| 50              |                                    | Sichuan        | 27.45   | 37.87   |
| 51              |                                    | Yunnan         | 324.71  | 194.70  |
| 52              | Northern and<br>Northwest<br>China | Hebei          | 39.28   | 59.25   |
| 53              |                                    | Hebei          | 30.65   | 25.57   |
| 54              |                                    | Hebei          | 48.08   | 79.58   |
| 55              |                                    | Hebei          | 203.02  | 239.00  |
| 56              |                                    | Beijing        | 733.21  | 276.47  |
| 57              |                                    | Beijing        | 2420.87 | 1156.55 |
| 58              |                                    | Beijing        | 115.70  | 96.46   |
| 59              |                                    | Beijing        | 30.73   | 28.99   |
| 60              |                                    | Inner Mongolia | 425.25  | 428.18  |
| 61              |                                    | Beijing        | 105.89  | 102.04  |
| 62              |                                    | Beijing        | 74.09   | 63.86   |
| 63              |                                    | Beijing        | 281.35  | 327.25  |
| 64              |                                    | Beijing        | 31.57   | 32.08   |
| 65              |                                    | Inner Mongolia | 134.55  | 158.34  |
| 66              |                                    | Shanxi         | 159.98  | 248.68  |
| 67              |                                    | Shaanxi        | 149.48  | 135.57  |
| 68              |                                    | Hebei          | 634.89  | 644.40  |
| 69              | Central and<br>Southern China      | Henan          | n.d.    | 35.14   |
| 70 <sup>a</sup> |                                    | Henan          | 26.02   | 35.61   |
| 71 <sup>a</sup> |                                    | Henan          | 97.83   | 80.61   |
| 72 <sup>a</sup> |                                    | Henan          | 37.49   | 41.40   |
| 73 <sup>a</sup> |                                    | Henan          | 56.77   | 42.32   |
| 74 <sup>a</sup> |                                    | Hubei          | <LOQ    | 12.58   |
| 75 <sup>a</sup> |                                    | Taiwan         | <LOQ    | 13.82   |
| 76 <sup>a</sup> |                                    | Taiwan         | 19.22   | 22.99   |
| 77 <sup>a</sup> |                                    | Taiwan         | 49.84   | 41.21   |
| 78              |                                    | Hong Kong      | 109.57  | 97.19   |
| 79              |                                    | Guangxi        | 47.57   | 52.94   |
| 80              |                                    | Hubei          | 28.50   | 9.13    |

|                  |               |              |         |        |
|------------------|---------------|--------------|---------|--------|
| 81 <sup>a</sup>  |               | Guangdong    | 18.14   | 18.93  |
| 82 <sup>a</sup>  |               | Guangdong    | n.d.    | 13.25  |
| 83               |               | Guangdong    | 79.07   | 98.33  |
| 84               |               | Guangdong    | 17.52   | 3.47   |
| 85               | Eastern China | Fujian       | 34.67   | 14.32  |
| 86               |               | Fujian       | 83.16   | 112.67 |
| 87               |               | Jiangxi      | 25.61   | 26.97  |
| 88               |               | Fujian       | 30.59   | 43.96  |
| 89               |               | Fujian       | 49.63   | 64.34  |
| 90               |               | Fujian       | 25.40   | 32.59  |
| 91               |               | Fujian       | 224.51  | 215.73 |
| 92               |               | Fujian       | 38.09   | 44.73  |
| 93 <sup>a</sup>  |               | Fujian       | 71.76   | 64.09  |
| 94 <sup>a</sup>  |               | Fujian       | 25.11   | 46.74  |
| 95 <sup>a</sup>  |               | Fujian       | 114.68  | 128.69 |
| 96 <sup>a</sup>  |               | Shandong     | 203.53  | 256.54 |
| 97 <sup>a</sup>  |               | Anhui        | 39.94   | 32.71  |
| 98 <sup>a</sup>  |               | Zhejiang     | 121.14  | 106.46 |
| 99 <sup>a</sup>  |               | Jiangsu      | 248.26  | 217.94 |
| 100 <sup>a</sup> |               | Shandong     | 130.32  | 122.19 |
| 101 <sup>a</sup> |               | Anhui        | 153.32  | 187.88 |
| 102 <sup>a</sup> |               | Shandong     | 38.99   | 54.87  |
| 103 <sup>a</sup> |               | Shandong     | 182.02  | 203.25 |
| 104              | Northeast     | Liaoning     | 79.53   | 114.71 |
| 105              | China         | Liaoning     | n.d.    | 1.11   |
| 106              |               | Liaoning     | 1376.44 | 609.99 |
| 107              |               | Liaoning     | 35.75   | 21.40  |
| 108              |               | Liaoning     | 82.87   | 97.80  |
| 109              |               | Liaoning     | 146.11  | 158.47 |
| 110              |               | Liaoning     | 61.43   | 68.29  |
| 111              |               | Liaoning     | 117.68  | 127.80 |
| 112              |               | Liaoning     | 87.50   | 116.33 |
| 113              |               | Liaoning     | 530.75  | 398.62 |
| 114              |               | Liaoning     | 61.26   | 76.74  |
| 115              |               | Heilongjiang | 28.24   | 5.00   |
| 116              |               | Heilongjiang | 24.47   | 16.31  |
| 117              |               | Heilongjiang | 65.19   | 88.23  |
| 118              |               | Heilongjiang | 46.65   | 37.88  |
| 119              |               | Heilongjiang | 1036.95 | 637.09 |
| 120              |               | Heilongjiang | 28.17   | 19.82  |
| 121              |               | Heilongjiang | 444.75  | 538.08 |
| 122              |               | Heilongjiang | 30.70   | 5.61   |

n.d. is not detected; a means powdered coix seed.
